# Supplementary material
Source: PubMed Central journal article supplement (PMC5077697)
Supplement: NIHMS771331-supplement-Supplemental_Data_File___doc___tif__pdf__etc___1.pdf [file NIHMS771331-supplement-Supplemental_Data_File___doc___tif__pdf__etc___1.pdf]

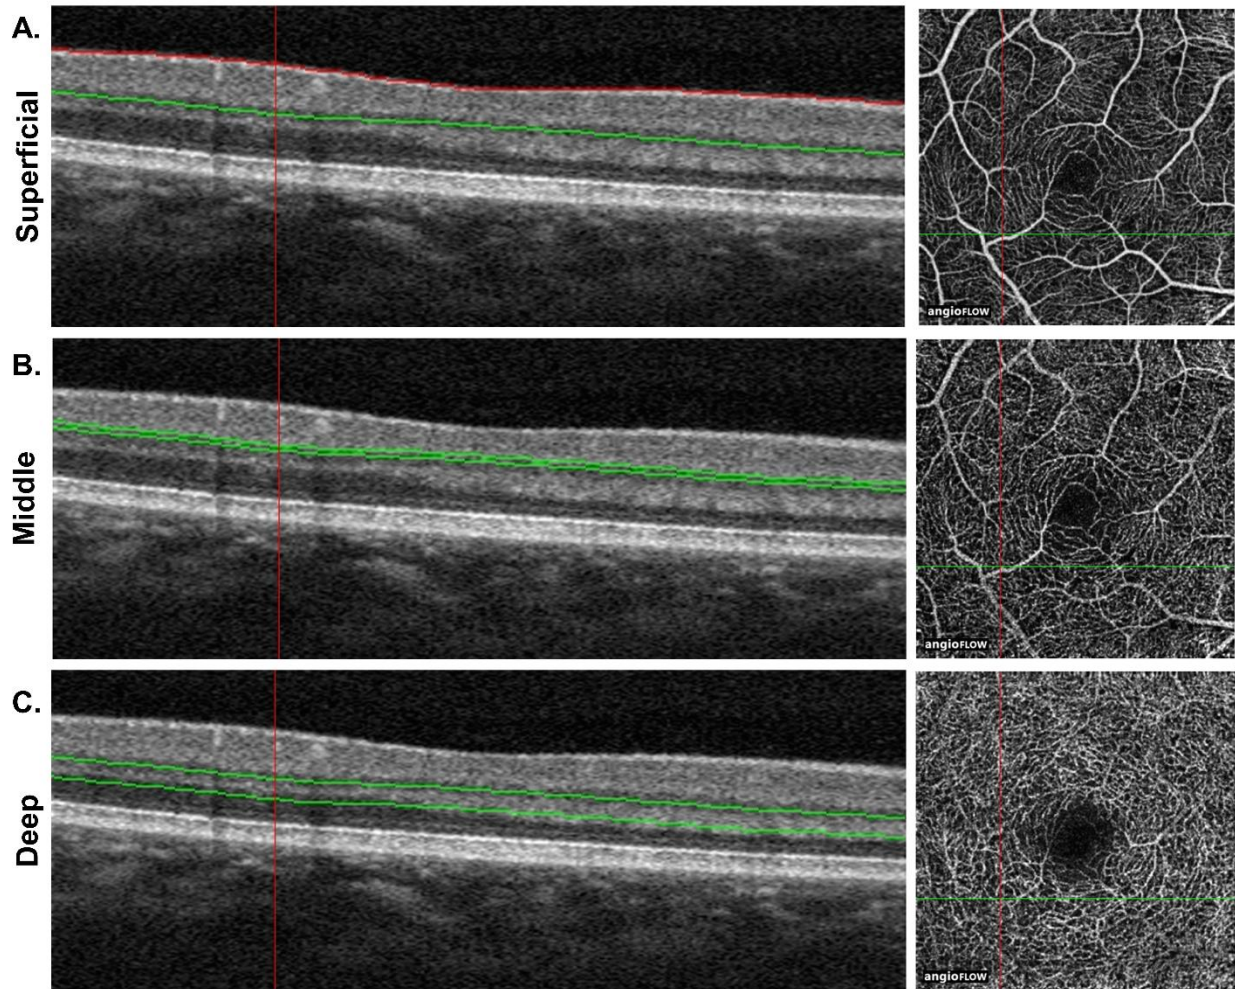

**Supplementary Figure 1: Optical coherence tomography angiography (OCTA)**

**segmentation used to visualize the three capillary plexuses in Method 1 using the automated pre-set boundaries.**

**A.** The superficial capillary plexus (SCP) boundaries were set with the inner boundary at 3  $\mu\text{m}$  beneath the internal limiting membrane (ILM), and the outer boundary at 15  $\mu\text{m}$  beneath the inner plexiform layer (IPL). **B.** The middle capillary plexus (MCP) was captured with a thin 15  $\mu\text{m}$  slab that was set at the inner border of the inner nuclear layer (INL). **C.** The deep capillary plexus (DCP) was set with the inner boundary at 15  $\mu\text{m}$  beneath the IPL and the outer boundary at 70  $\mu\text{m}$  beneath the IPL.
