# Supplementary material
Source: PubMed Central journal article supplement (PMC5077697)
Supplement: NIHMS771331-supplement-Supplemental_Data_File___doc___tif__pdf__etc___2.pdf [file NIHMS771331-supplement-Supplemental_Data_File___doc___tif__pdf__etc___2.pdf]

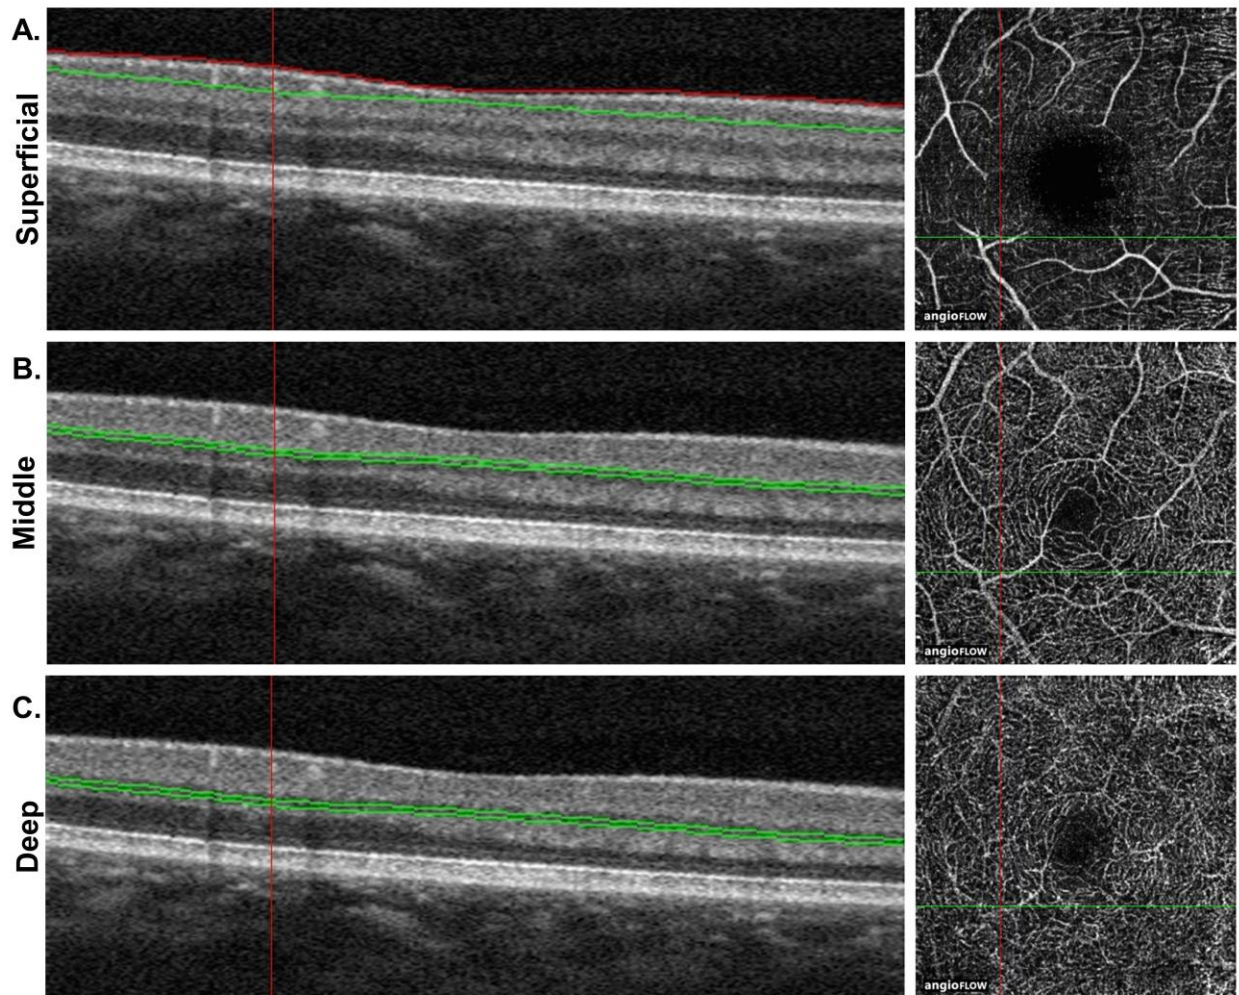

**Supplementary Figure 2: Optical coherence tomography angiography (OCTA) segmentation used to visualize the three capillary plexuses in Method 2.**

**A.** The superficial capillary plexus (SCP) boundaries were set with the inner boundary at  $3\ \mu\text{m}$  beneath the internal limiting membrane (ILM), and the outer boundary set at a level sufficient to incorporate the nerve fiber layer (NFL) and ganglion cell layer (GCL). **B.** The middle capillary plexus (MCP) was captured with a thin  $15\ \mu\text{m}$  slab that was set at the inner border of the inner nuclear layer (INL) **C.** The deep capillary plexus (DCP) was captured with a thin  $15\ \mu\text{m}$  slab set at the outer border of the INL.
