# Supplementary material
Source: PubMed Central journal article supplement (PMC5077697)
Supplement: NIHMS771331-supplement-Supplemental_Data_File___doc___tif__pdf__etc___3.pdf [file NIHMS771331-supplement-Supplemental_Data_File___doc___tif__pdf__etc___3.pdf]

Supplementary Table 1: **DEMOGRAPHIC CHARACTERISTICS OF HEALTHY CONTROLS**

| <b>Case<br/>Number</b> | <i>Sex</i> | <i>Age</i> |
|------------------------|------------|------------|
| 1                      | M          | 23         |
| 2                      | F          | 22         |
| 3                      | M          | 25         |
| 4                      | M          | 25         |
| 5                      | M          | 24         |
| 6                      | M          | 25         |
| 7                      | M          | 26         |
| 8                      | F          | 54         |
| 9                      | F          | 38         |
| 10                     | M          | 30         |
