# Supplementary material
Source: PubMed Central journal article supplement (PMC5077697)
Supplement: NIHMS771331-supplement-Supplemental_Data_File___doc___tif__pdf__etc___4.pdf [file NIHMS771331-supplement-Supplemental_Data_File___doc___tif__pdf__etc___4.pdf]

Supplementary Table 2: **DEMOGRAPHIC CHARACTERISTICS OF STUDY PARTICIPANTS WITH DIABETIC RETINOPATHY**

| <b>Case Number</b> | <i>Sex/Age, y</i> | <i>DM Type</i> | <i>Duration of DM, y</i> | <i>HbA1c</i> | <i>HTN</i> | <i>HLD</i> | <i>KD</i> | <i>Study Eye</i> | <i>BCVA</i> | <i>DR Stage</i> | <i>Laser Treatment</i> | <i>Diabetes Medication</i> |
|--------------------|-------------------|----------------|--------------------------|--------------|------------|------------|-----------|------------------|-------------|-----------------|------------------------|----------------------------|
| 1                  | M/early 40s       | 2              | 10                       | 11.3         | No         | No         | No        | Both             | 20/20 (OU)  | Moderate NPDR   | None                   | Metformin                  |
| 2                  | F/early 30s       | 1              | 26                       | 9            | No         | No         | No        | Both             | 20/20 (OU)  | PDR             | PRP (OS)               | Insulin                    |
| 3                  | M/late 30s        | 1              | 34                       | 7.3          | No         | No         | Yes       | Both             | 20/30 (OU)  | PDR             | None                   | Insulin                    |
| 4                  | F/early 70s       | 2              | 28                       | 8            | Yes        | No         | No        | Left             | 20/20       | PDR             | PRP (OU)               | Metformin                  |
| 5                  | M/mid 50s         | 2              | 12                       | 7            | Yes        | Yes        | No        | Left             | 20/40       | PDR             | PRP (OU)               | Metformin                  |
| 6                  | M/early 40s       | 2              | 0.5                      | 8.3          | No         | No         | No        | Left             | 20/40       | NPDR            | None                   | Metformin                  |
| 7                  | M/early 40s       | 2              | 5                        | 7.9          | Yes        | No         | No        | Right            | 20/20       | PDR             | PRP + Focal (OU)       | Insulin, liraglutide       |
| 8                  | F/early 30s       | 1              | 17                       | 5.9          | Yes        | No         | Yes       | Right            | 20/20       | PDR             | None                   | Insulin                    |
| 9                  | M/early 50s       | 2              | 4                        | 7.4          | No         | No         | No        | Left             | 20/25       | NPDR            | None                   | Metformin                  |

Abbreviations: DM = Diabetes mellitus, HbA1c = Glycated hemoglobin, percent of total hemoglobin, HTN = Hypertension, HLD = Hyperlipidemia, KD = Kidney disease, BCVA = Best corrected visual acuity, DR = Diabetic retinopathy, PDR = Proliferative diabetic retinopathy, NPDR = Non-proliferative diabetic retinopathy, PRP = Panretinal photocoagulation, OU = Oculus uterque (both eyes), OD = Oculus dexter (right eye), OS = Oculus sinister (left eye), y = Years
